# Supplementary material for: Engineered IL13 variants direct specificity of IL13Rα2-targeted CAR T cell therapy
Source: PubMed Central journal article supplement (PMC9388138; doi:10.1073/pnas.2112006119), 2022-08-08
Supplement: pnas.2112006119.sapp.pdf [file pnas.2112006119.sapp.pdf]

# Supplemental Figure 1

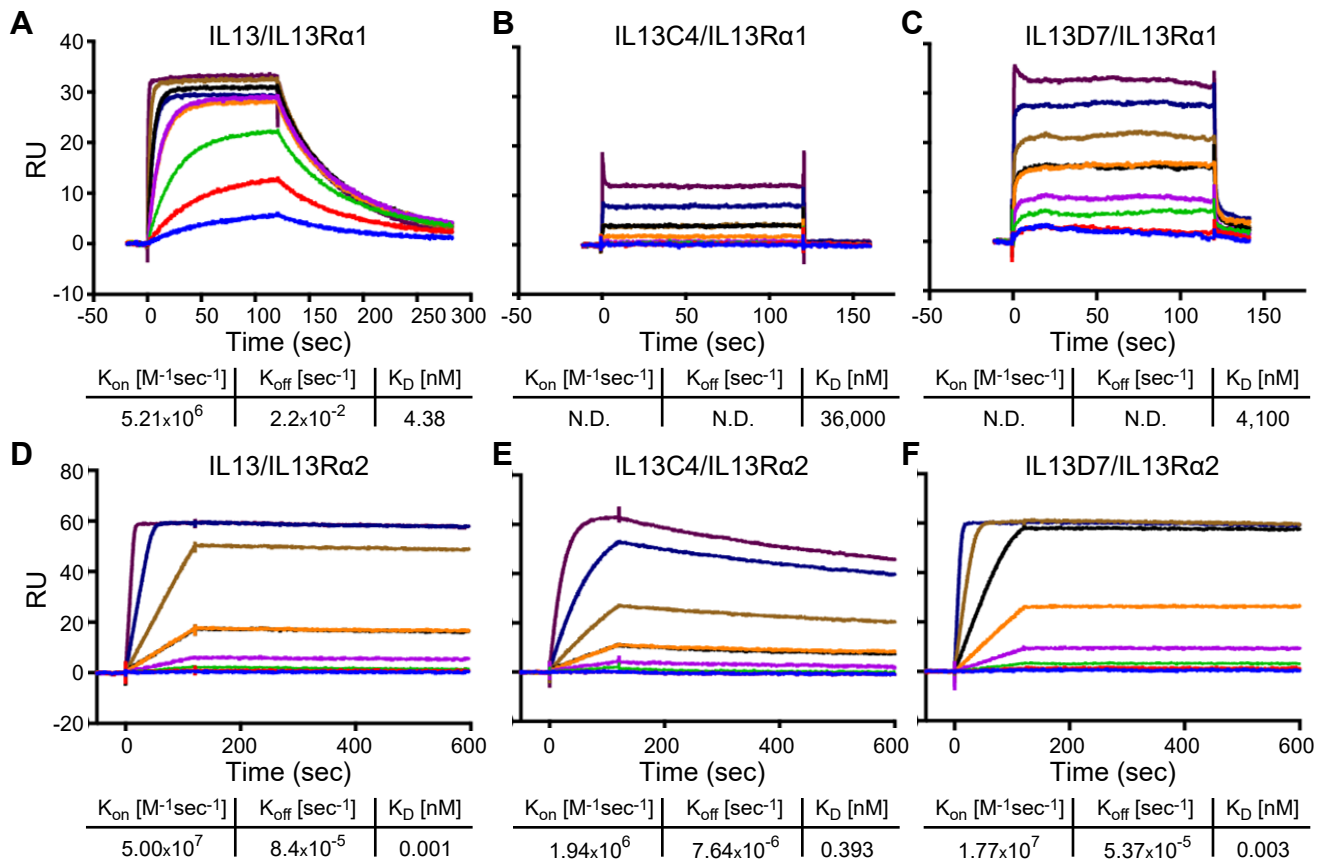

**Supplemental Figure 1. IL13Rα1 and IL13Rα2 binding affinities of the IL13 variants.** Ratio of surface plasmon resonance measurements of IL13, IL13 C4, and IL13 D7 compared to (A-C) IL13Rα1 and (D-F) IL13Rα2. IL-13Rα1 and IL13Rα2 were immobilized on the surface of the chip and the indicated doses of IL13 or the two IL13 mutants were flowed.

# Supplemental Figure 2

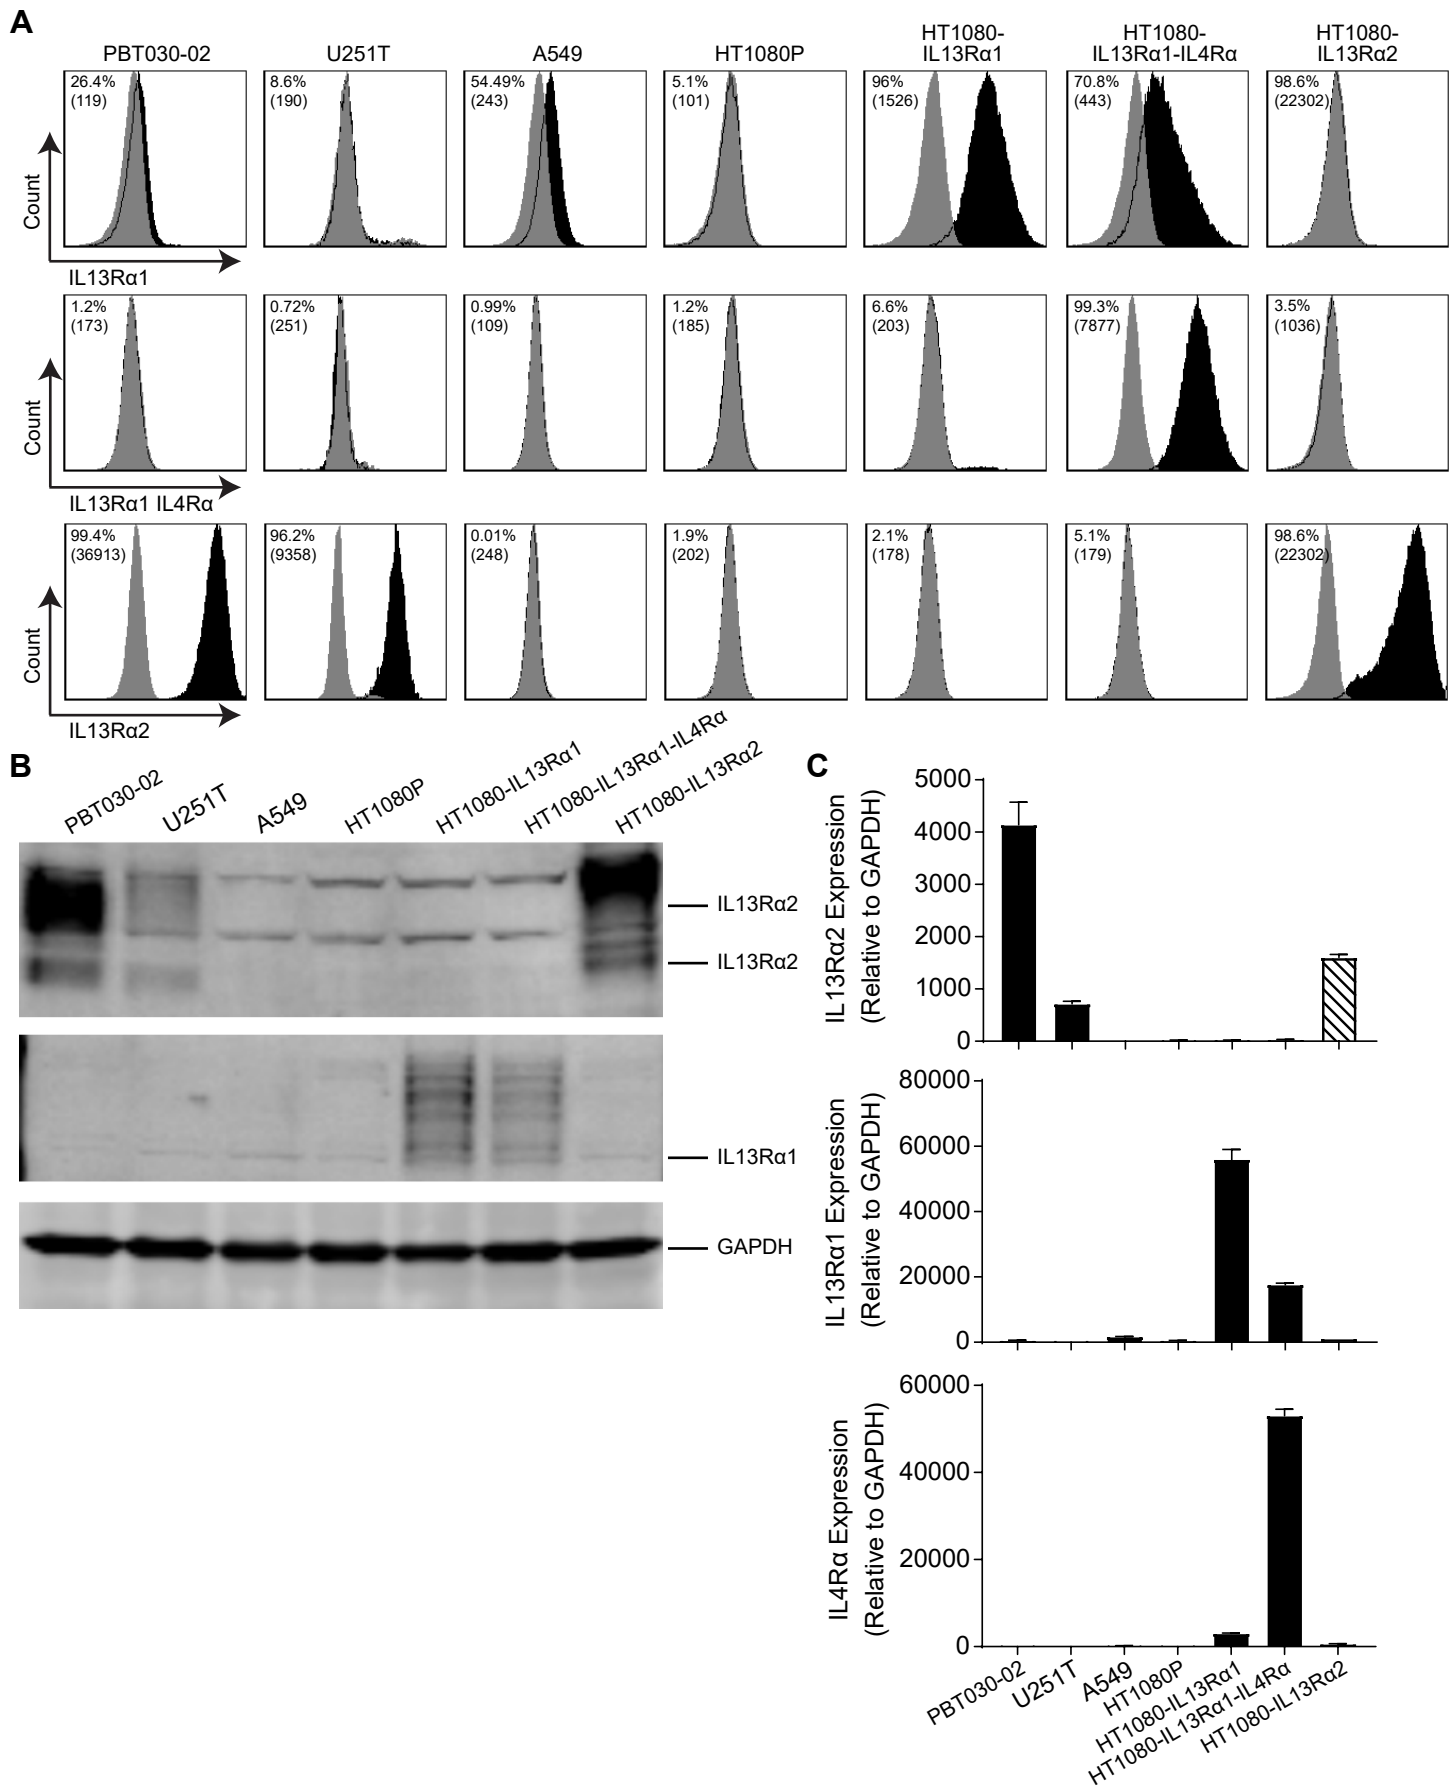

## Supplemental Figure 2.

Detection of IL-13R $\alpha$ 2, IL-13R $\alpha$ 1, and IL-4R. **A**, Flow cytometry histograms showing either IL-13R $\alpha$ 2, IL-13R $\alpha$ 1, or IL-4R expression in the following adherent human cancer cell lines: PBT030-02, U251T, A549, HT1080P, HT1080-IL13R $\alpha$ 1, HT1080-IL13R $\alpha$ 1/IL4R $\alpha$ , and HT1080-IL13R $\alpha$ 2. The cancer cell lines were enzymatically dissociated into single cells and immediately stained with antigen markers (IL13R $\alpha$ 2, IL13R $\alpha$ 1, IL4R $\alpha$ ) at 4C° in the dark for 30 min. Cells were then assessed by flow cytometry and the antigen expression of viable tumors were displayed as histograms. Values located within each histogram represent the % expression with the mean fluorescence intensity (MFI) in parentheses. **B**, Western blot showing the protein expression of IL13R $\alpha$ 2 and IL13R $\alpha$ 1, with  $\beta$ -actin as a loading control. **C**, qPCR analysis showing the mRNA expression of *IL13R $\alpha$ 2*, *IL13R $\alpha$ 1*, *IL4R $\alpha$*  and codon optimized *IL13R $\alpha$ 2*. For both Western blot and qPCR, protein or mRNA lysates were isolated, respectively, from the previously mentioned cancer cell lines. All data shown are means  $\pm$  sem.

# Supplemental Figure 3

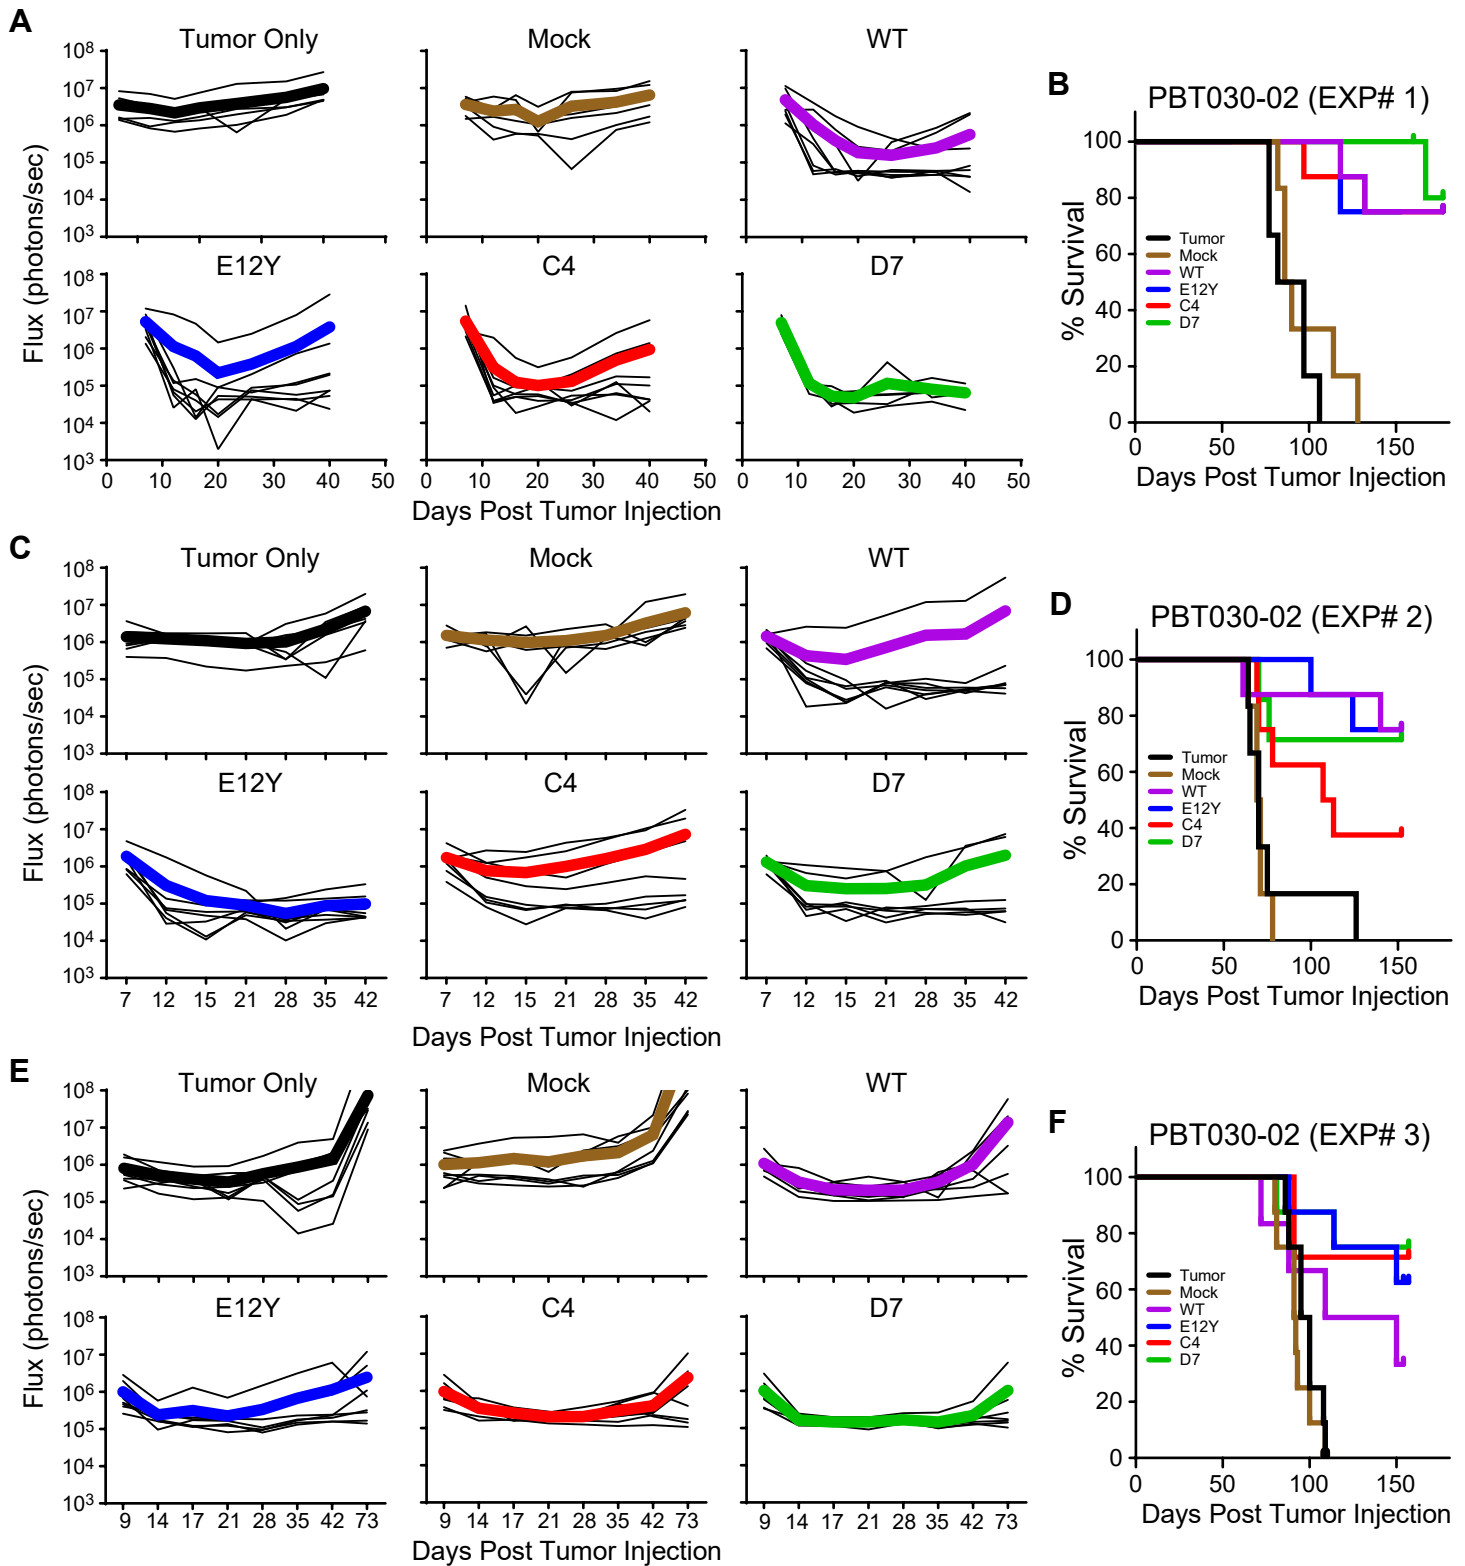

**Supplemental Figure 3. IL13-E12Y, -C4 and -D7 mutein CARs exhibit similar levels of therapeutic efficacy *in vivo* against a human glioma model. (A, C, E)** Quantification of ffLuc<sup>+</sup> flux (photons/sec) show C4 and D7 IL13 mutein CAR T cells have comparable potency to the WT and E12Y single mutant IL13-CARs. Solid lines represent the flux values of individual mice while the colored solid lines represent the average flux of that treatment cohort. Data are representative of three independent experiments (n= 6-8). **(B, D, F)** Kaplan-Meier survival curves for the corresponding adjacent flux values of the individual demonstrating comparable survival and tumor relapse rate for mice treated with the IL13-CAR variants, with IL13-WT, -E12Y, -C4, and -D7 CAR T cells all improving survival as compared to mock T cell treated and untreated mice ( $p \leq 0.0001$  Mantle-Cox log rank test (n=6-8)).

# Supplemental Figure 4

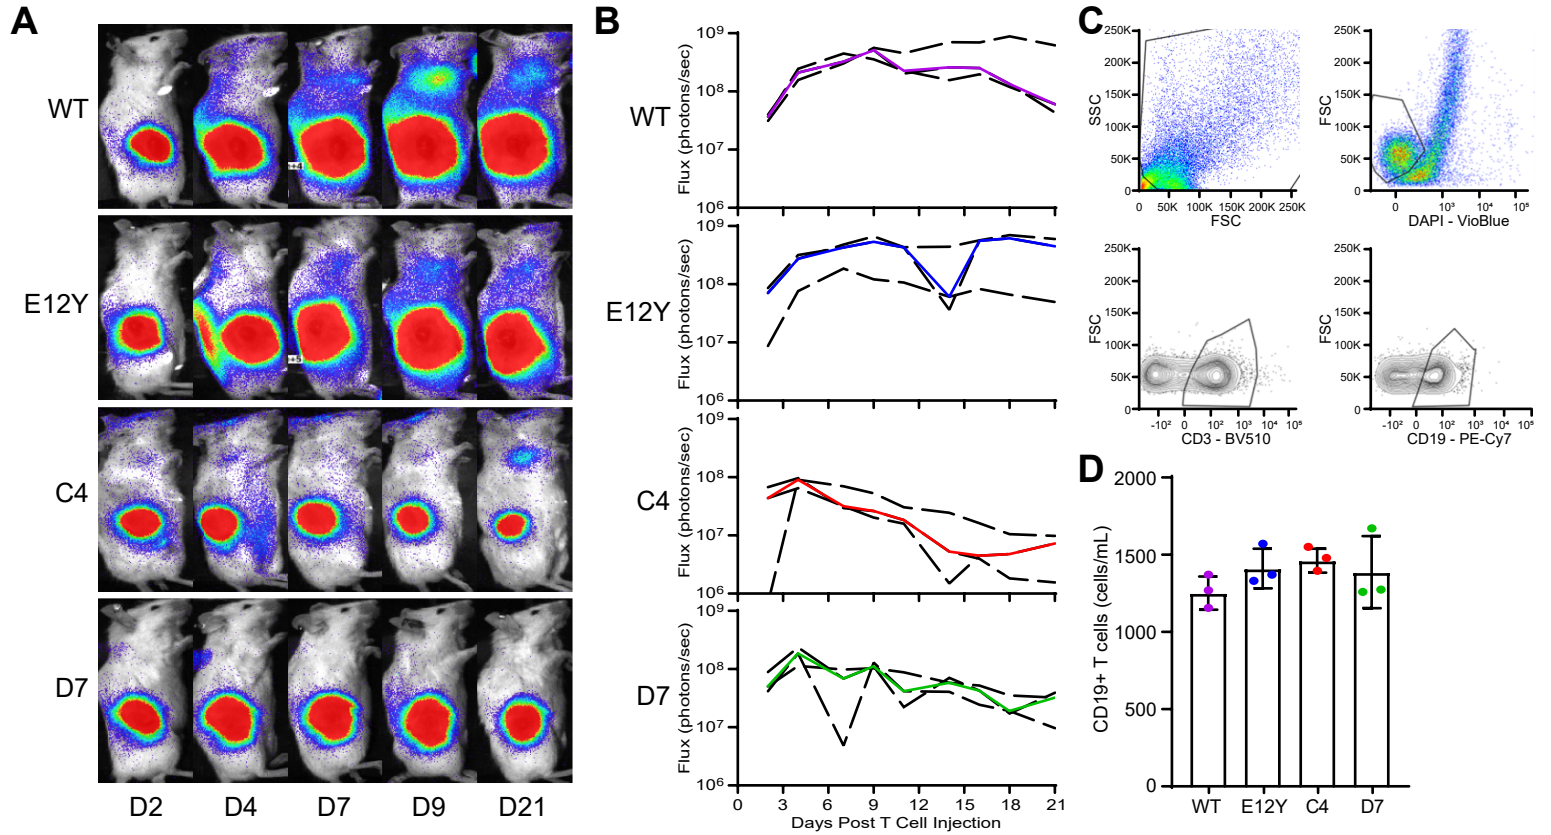

**Supplemental Figure 4. IL13-C4 and -D7 meitin CARs exhibit reduced tumor burden *in vivo* against a human glioma model. (A)** On day -33, 3 groups of mice (n=4) were injected with either  $1 \times 10^6$ ,  $2 \times 10^6$ , or  $5 \times 10^6$  M202 tumor cells. On day 0, the mice were resorted into 4 groups (n=3) and injected with  $2 \times 10^6$  WT, E12Y, C4, or D7 variant CAR T cells that co-expressed ffluc. Luminescence imaging was carried out to track CAR T cell persistence. One representative mouse from each group is shown. **(B)** Quantification of ffluc+ flux (photons/sec) showing CAR T cell persistence. Dashed lines represent the flux values of individual mice while the colored solid lines represent the average flux for that treatment cohort. **(C)** At the experimental endpoint, tumors were excised and dissociated for flow cytometry analysis. The gating strategy for quantifying live CAR T cells (CD3+ CD19+) is shown. **(D)** Counts of CAR T cells in dissociated tumors were quantified by flow cytometry (mean  $\pm$  SD; n=3).

# Supplemental Figure 5

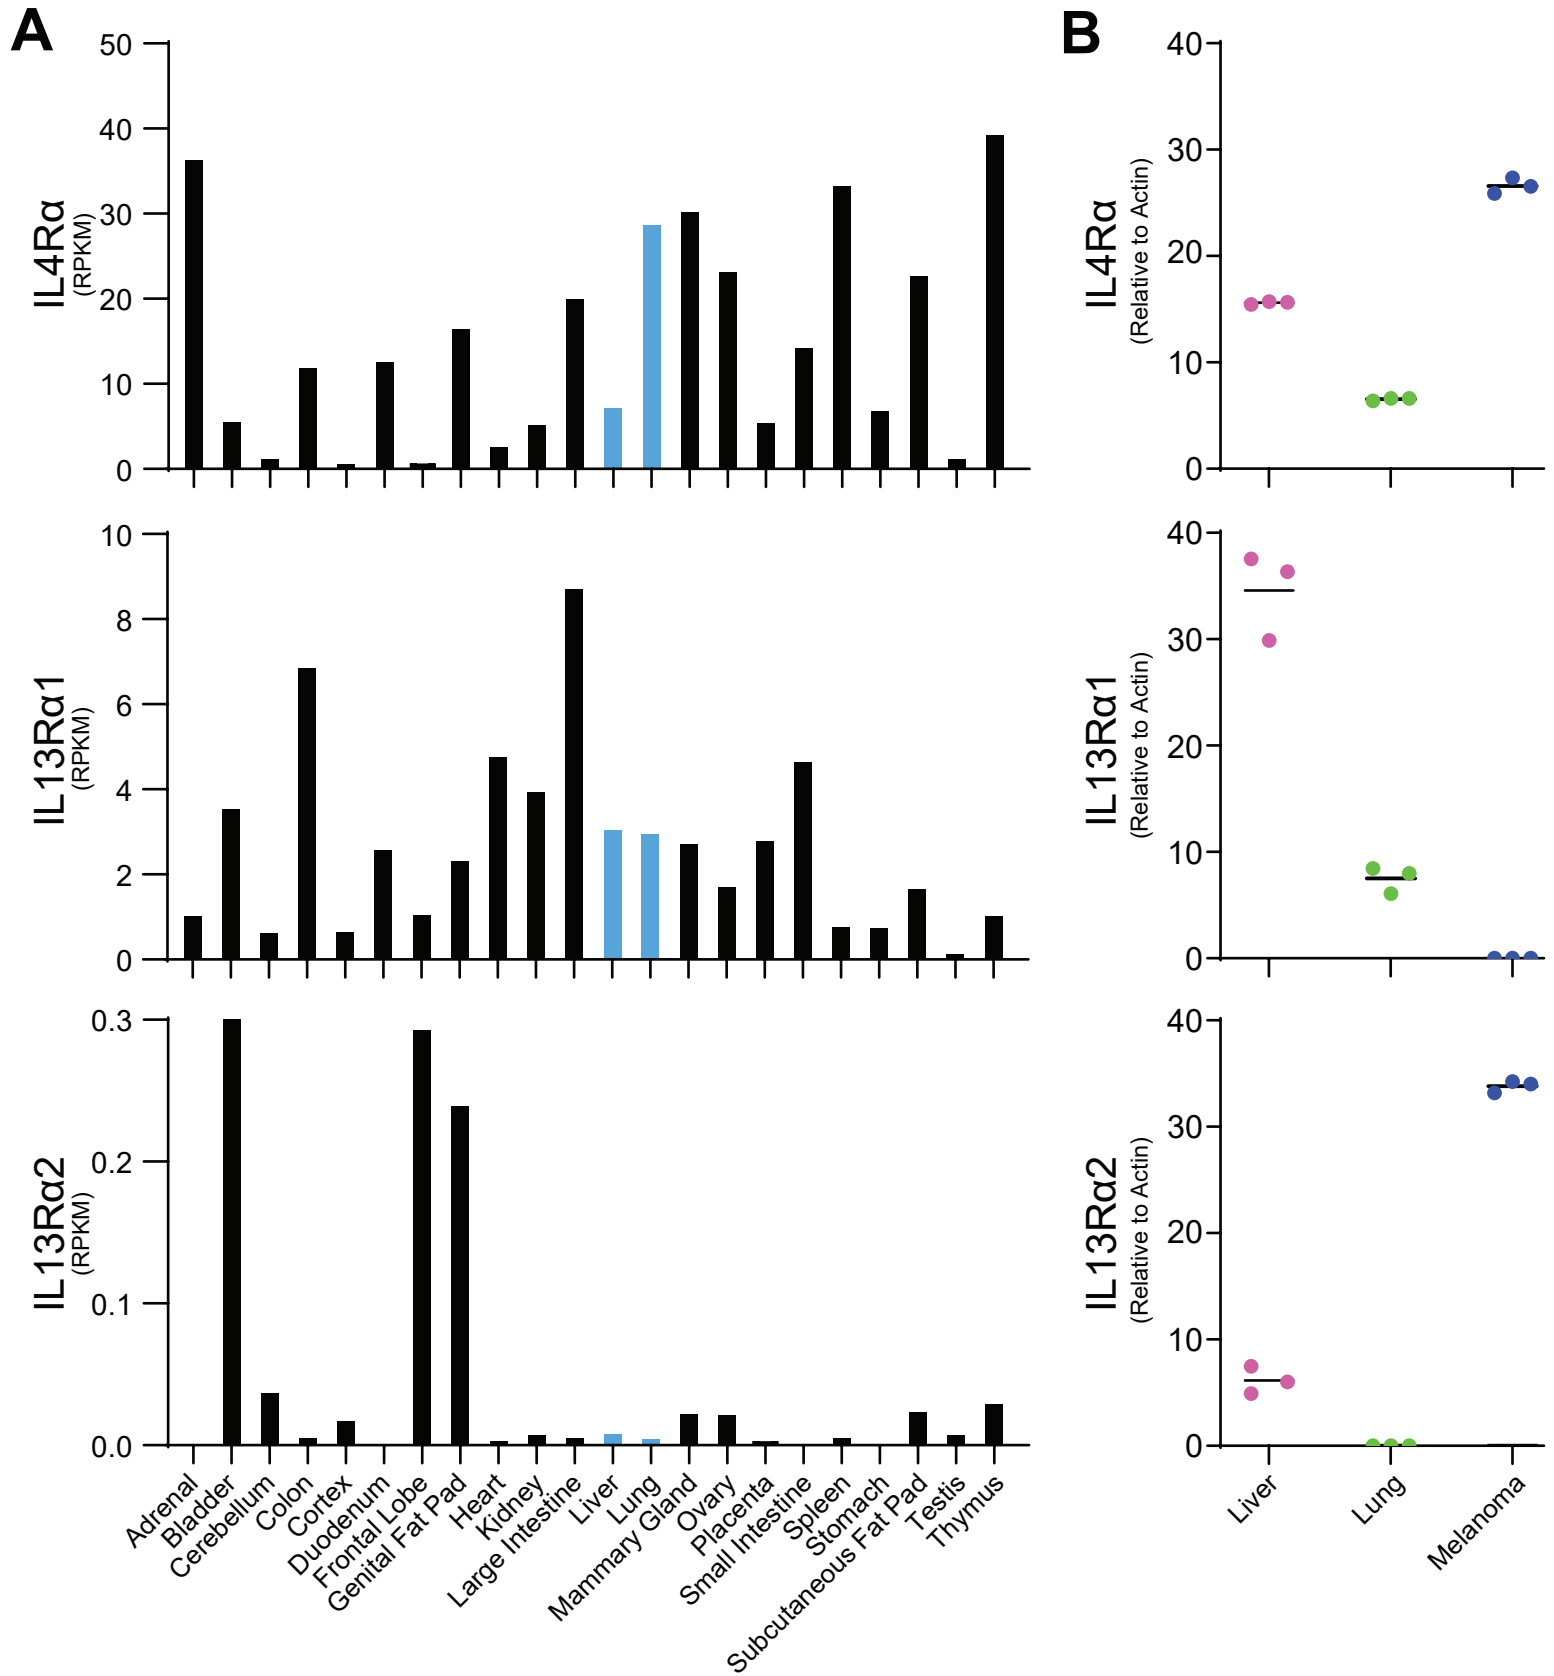

**Supplemental Figure 5. Expression of IL4Rα, IL13Rα1, or IL13Rα2 in mouse tissue.** (A) RNAseq data from the Encyclopedia of DNA Elements (ENCODE) shows expression levels of IL4Rα, IL13Rα1, or IL13Rα2 in C57BL/6 mouse tissues. The Y axis was scaled according to RPKM expression levels. (B) Quantitative PCR detected expression levels of IL4Rα, IL13Rα1, or IL13Rα2 in isolated liver and lung from NSG mice and a melanoma cell line (n=3 per group).

# Supplemental Figure 6

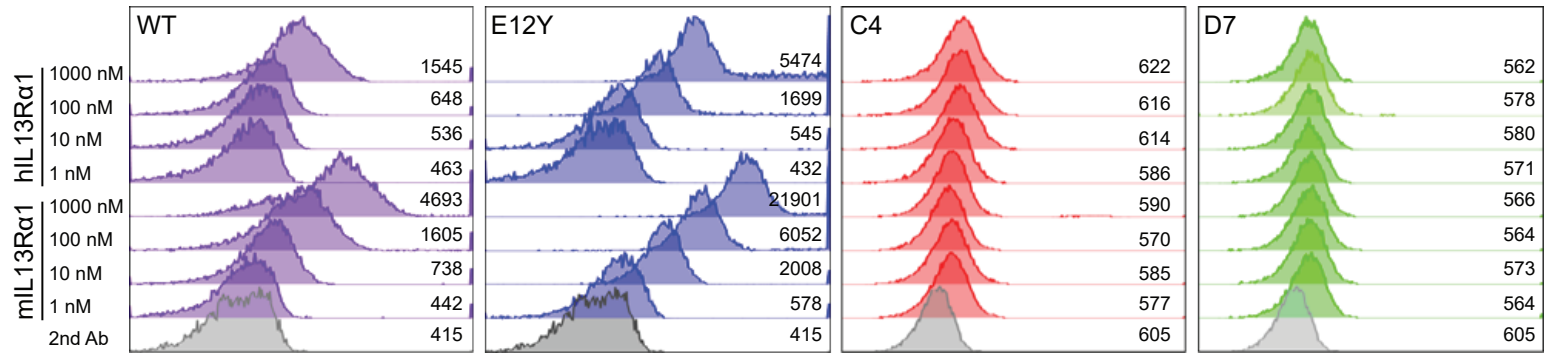

**Supplemental Figure 6. Binding characteristics of human and murine IL13R $\alpha$ 1 with WT, E12Y, C4, and D7 muteins.** Recombinant human and mouse IL13R $\alpha$ 1 were incubated with WT, E12Y, C4, or D7 CAR T cells at the concentrations shown. Binding was quantified by flow cytometry with MFI shown for each histogram. One representative trial for each variant is shown.

# Supplemental Figure 7

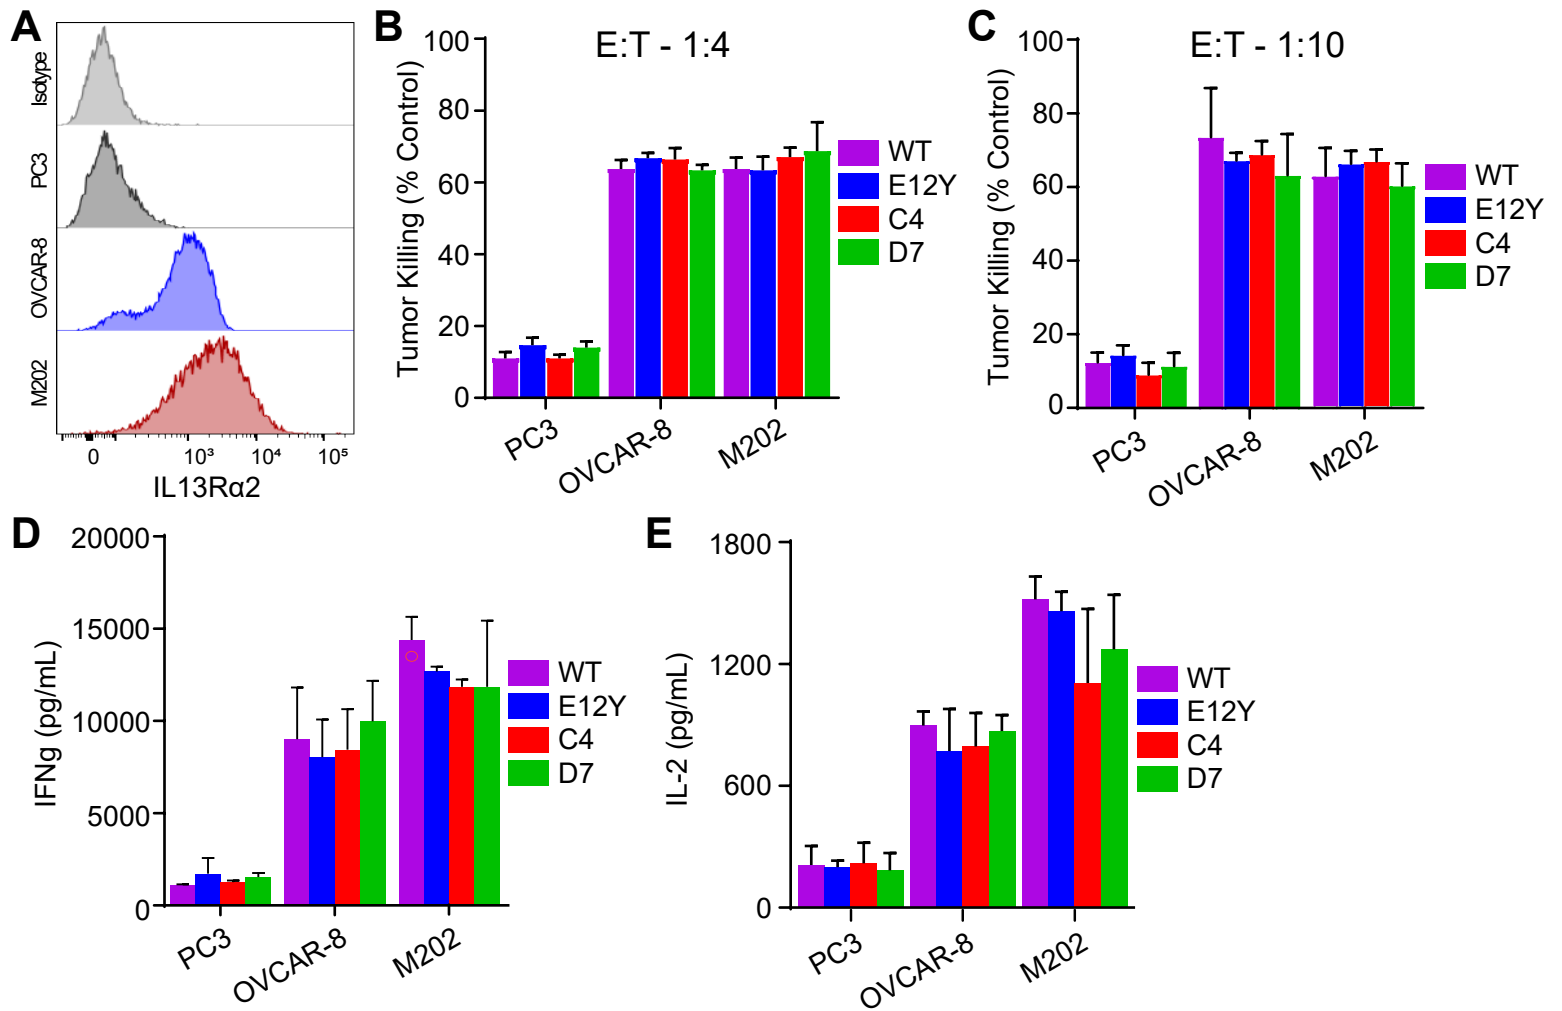

**Supplemental Figure 7. Tumor killing and cytotoxicity of WT, E12Y, C4, or D7 muteins in other cancers.** Muteins were co-cultured at a 1:4 or 1:10 effector to target (E:T) ratio with PC3 cells (do not express IL13Rα2) or IL13Rα2+ OVCAR-8 and M202 (n=4). After 24hrs, IFN-γ and IL-2 levels were measured by Luminex assay. **(A)** Expression of IL13Rα2 in PC3, OVCAR-8, and M202 tumor lines. **(B, C)** Tumor killing of PC3, OVCAR-8, and M202 tumor lines at an E:T of 1:4 (B) and 1:10 (C). **(D, E)** IFN-γ and IL-2 secretion by CAR T cells co-cultured with PC3, OVCAR-8, and M202 cell lines.

# Supplemental Table 1

| Organ                | GEO Number  | Data Coordination Center |
|----------------------|-------------|--------------------------|
| Adrenal              | GSM900188   | ENCODE DCC               |
| Bladder              | GSM10000565 | ENCODE DCC               |
| Cerebellum           | GSM10000576 | ENCODE DCC               |
| Colon                | GSM900198   | ENCODE DCC               |
| Cortex               | GSM10000563 | ENCODE DCC               |
| Duodenum             | GSM900187   | ENCODE DCC               |
| Frontal Lobe         | GSM10000562 | ENCODE DCC               |
| Genital Fat Pad      | GSM900190   | ENCODE DCC               |
| Heart                | GSM900199   | ENCODE DCC               |
| Kidney               | GSM900194   | ENCODE DCC               |
| Large Intestine      | GSM900189   | ENCODE DCC               |
| Liver                | GSM900195   | ENCODE DCC               |
| Lung                 | GSM900196   | ENCODE DCC               |
| Mammary Gland        | GSM900184   | ENCODE DCC               |
| Ovary                | GSM900183   | ENCODE DCC               |
| Placenta             | GSM10000565 | ENCODE DCC               |
| Small Intestine      | GSM900186   | ENCODE DCC               |
| Spleen               | GSM900197   | ENCODE DCC               |
| Stomach              | GSM900185   | ENCODE DCC               |
| Subcutaneous Fat Pad | GSM900191   | ENCODE DCC               |
| Testes               | GSM900193   | ENCODE DCC               |
| Thymus               | GSM900192   | ENCODE DCC               |

**Supplemental Table 1. ENCODE data sets.** Organs, GEO numbers, and data coordination centers were obtained from the ENCODE website (gene IDs: IL13Ra2 – 16165, IL13Ra1 – 16164, and IL4Ra – 16190).
